# Supplementary material for: Population-level deficit of homozygosity unveils CPSF3 as an intellectual disability syndrome gene
Source: PubMed Central journal article supplement (PMC8817032; doi:10.1038/s41467-022-28330-8), 2022-02-04
Supplement: 41467_2022_28330_MOESM3_ESM.pdf [file 41467_2022_28330_MOESM3_ESM.pdf]

## **Description of Additional Supplementary Files**

**File name:** Supplementary Data 1.

**Description:** Missense variants with a minor allele frequency (MAF) greater than 0.40% and a complete deficit of observed versus expected homozygous carriers in deCODE's set of 153,054 chip-genotyped and imputed Icelanders.
